# Supplementary material for: Complete disassembly of carbon disulfide by a ditantalum complex
Source: Royal Society of Chemistry journal article supplement (doi:10.1039/c0cc03483e), 2010-01-01
Supplement: c0cc03483e.pdf [file c0cc03483e.pdf]

## Complete Disassembly of Carbon Disulfide by a Ditantalum Complex

Joachim Ballmann, Alyssa Yeo, Bruce A. MacKay, Sabine van Rijt, Brian O. Patrick, and Michael D. Fryzuk\*

Department of Chemistry, The University of British Columbia, 2036 Main Mall, Vancouver, BC, V6T 1Z1 CANADA.

### Experimental Procedures

All manipulations were performed under an atmosphere of dry and oxygen-free dinitrogen by means of standard Schlenk or Glovebox techniques. Anhydrous Et<sub>2</sub>O, hexanes and toluene were purchased from Aldrich, sparged with dinitrogen and dried further by passage through towers containing activated alumina and molecular sieves. Benzene was purchased from Aldrich, dried over sodium benzophenone ketyl and distilled under positive pressure. Toluene-d<sub>8</sub> and benzene-d<sub>6</sub> were refluxed over sodium, vacuum transferred and freeze-pump-thaw degassed. <sup>1</sup>H, <sup>31</sup>P and <sup>13</sup>C NMR spectra were recorded on a Bruker AV-400 MHz spectrometer. Unless noted otherwise, all spectra were recorded at room temperature. <sup>1</sup>H NMR spectra were referenced to residual proton signals in C<sub>6</sub>D<sub>6</sub> (7.16 ppm) or C<sub>7</sub>D<sub>8</sub> (2.09); <sup>31</sup>P NMR spectra were referenced to external P(OMe)<sub>3</sub> (141.0 ppm with respect to 85% H<sub>3</sub>PO<sub>4</sub> at 0.0 ppm); <sup>13</sup>C NMR spectra were referenced to the solvent resonances of C<sub>6</sub>D<sub>6</sub> (128.0 ppm) or C<sub>7</sub>H<sub>8</sub> (20.4 ppm). Microanalyses (C, H, N) and mass spectroscopy (low and high resolution EI) were performed at the Department of Chemistry at the University of British Columbia. Carbon disulfide and <sup>13</sup>CS<sub>2</sub> were purchased from Aldrich, distilled, degassed and stored over molecular sieves prior to use. Compounds [PhP(CH<sub>2</sub>SiMe<sub>2</sub>NPh)<sub>2</sub>]TaMe<sub>3</sub>, [PhP(CH<sub>2</sub>SiMe<sub>2</sub>NPh)<sub>2</sub>Ta]<sub>2</sub>(μ-H)<sub>2</sub>(μ-η<sup>2</sup>:η<sup>1</sup>-N<sub>2</sub>), [PhP(CH<sub>2</sub>SiMe<sub>2</sub>NPh)<sub>2</sub>Ta]<sub>2</sub>(μ-D)<sub>2</sub>(μ-η<sup>2</sup>:η<sup>1</sup>-N<sub>2</sub>) and [PhP(CH<sub>2</sub>SiMe<sub>2</sub>NPh)<sub>2</sub>Ta]<sub>2</sub>(μ-H)<sub>2</sub>(μ-η<sup>2</sup>:η<sup>1-15</sup>N<sub>2</sub>) were prepared according to literature methods.<sup>[1]</sup> Hydrogen gas, <sup>15</sup>N<sub>2</sub> gas (isotopic purity 98%+) and D<sub>2</sub> gas (HD 0.4%) were purchased from Praxair or from Cambridge Isotopes Ltd. and passed through activated molecular sieves prior to use.

### [PhP(CH<sub>2</sub>SiMe<sub>2</sub>NPh)<sub>2</sub>Ta(μ-S)]<sub>2</sub>(μ-CH<sub>2</sub>) (2).

*Starting from [PhP(CH<sub>2</sub>SiMe<sub>2</sub>NPh)<sub>2</sub>Ta]<sub>2</sub>(μ-H)<sub>2</sub>(μ-η<sup>2</sup>:η<sup>1</sup>-N<sub>2</sub>):* A stirred solution of [PhP(CH<sub>2</sub>SiMe<sub>2</sub>NPh)<sub>2</sub>Ta]<sub>2</sub>(μ-H)<sub>2</sub>(μ-η<sup>2</sup>:η<sup>1</sup>-N<sub>2</sub>) (**1**) (315 mg, 0.25 mmol) in a mixture of toluene (10 ml) and Et<sub>2</sub>O (30 ml) was heated in an oil bath to 40°C. A 0.2 M solution of carbon disulfide in Et<sub>2</sub>O (1.25 ml, 0.25 mmol) was then added dropwise over a period of 15 minutes. Stirring at 40°C was continued for 10 min, before the reaction mixture was allowed to cool to room temperature. After stirring for 1.5 h at room temperature, all volatiles were removed in vacuum and the brown residue triturated with a mixture of hexanes (10 ml) and benzene (1 ml). The orange product was filtered off, washed with hexanes (5 ml) and dried in vacuum. Yield: 290 mg, 0.22 mmol, 88%. <sup>1</sup>H NMR (C<sub>6</sub>D<sub>6</sub>): δ 0.09 and 0.15 (s, 24H total, SiCH<sub>3</sub>), 0.86 - 1.45 (m, 8H total, SiCH<sub>2</sub>P), 4.95 (t, 2H, <sup>3</sup>J<sub>H,P</sub> = 6 Hz, TaCH<sub>2</sub>Ta), 6.7 - 7.8 (overlapping signals, approx. 30H, phenyl protons and residual protons in C<sub>6</sub>D<sub>6</sub>). <sup>1</sup>H{<sup>31</sup>P} NMR (C<sub>6</sub>D<sub>6</sub>), selected peaks only: δ 4.95 (s, 2H, TaCH<sub>2</sub>Ta), 7.56 (d, 2H, <sup>2</sup>J<sub>H,H</sub> = 7.2 Hz, *o*-PPh). <sup>31</sup>P{<sup>1</sup>H} NMR (C<sub>6</sub>D<sub>6</sub>): δ -5.2 (s). <sup>1</sup>H NMR (C<sub>7</sub>D<sub>8</sub>, -30°C): δ 0.05, 0.13, 0.14 and 0.20 (s, 24H total, SiCH<sub>3</sub>), 0.85 - 0.95 and 1.30 - 1.50 (m, 8H total, SiCH<sub>2</sub>P), 4.89 (m/unresolved dd, 2H, TaCH<sub>2</sub>Ta), 6.80 - 7.15 (t and m overlapping with solvent signals, approx. 10H, phenyl protons), 7.21 (t, 2H, <sup>2</sup>J<sub>H,H</sub> = 7.3 Hz, *p*-Ph protons), 7.31 (t, 4H, <sup>2</sup>J<sub>H,H</sub> = 7.3 Hz, phenyl protons), 7.41 (t, 4H, <sup>2</sup>J<sub>H,H</sub> = 7.7 Hz, phenyl protons), 7.52 (m, 4H, *o*-PPh), 7.76 (d, 4H, <sup>2</sup>J<sub>H,H</sub> = 7.4 Hz, *o*-NPh). <sup>1</sup>H{<sup>31</sup>P} NMR (C<sub>7</sub>D<sub>8</sub>, -

30°C), selected peaks only:  $\delta$  0.90 (d, 2H,  $^2J_{\text{H,H}} = 14.5$  Hz, SiCH<sub>2</sub>P), 1.32 (dd, 4H,  $^2J_{\text{H,H}} = 14.5$  Hz, SiCH<sub>2</sub>P), 1.45 (d, 2H,  $^2J_{\text{H,H}} = 14.5$  Hz, SiCH<sub>2</sub>P), 4.87 (s, 2H, TaCH<sub>2</sub>Ta), (7.51 (d, 4H,  $^2J_{\text{H,H}} = 7.4$  Hz, *o*-PPh). <sup>13</sup>C APT NMR (C<sub>7</sub>D<sub>8</sub>, -30°C):  $\delta$  1.16, 1.39, 2.79 and 2.92 (s, SiCH<sub>3</sub>), 12.99 and 17.18 (s, SiCH<sub>2</sub>P), 122.76, 124.53, 128.33, 129.35, 131.49 and 131.90 (s, *o*-, *m*- and *p*-Ph carbons), 141.47 (broad s, TaCH<sub>2</sub>Ta), 153.79 (d,  $^1J_{\text{C,P}} = 6.0$  Hz, *i*-PPh), 155.30 (s, *i*-NPh). MS (EI) *m/z* (%): 1308 (50) [M]<sup>+</sup>, 661 (40) [M - PhP(CH<sub>2</sub>SiMe<sub>2</sub>NPh)<sub>2</sub>TaS]<sup>+</sup>, 661 (40) [M - PhP(CH<sub>2</sub>SiMe<sub>2</sub>NPh)<sub>2</sub>TaS(CH<sub>2</sub>)]<sup>+</sup>. Anal. Calcd for C<sub>49</sub>H<sub>64</sub>N<sub>4</sub>P<sub>2</sub>S<sub>2</sub>Si<sub>4</sub>Ta<sub>2</sub>: C 44.95, H 4.93, N 4.28. Found: C 44.57, H 5.31, N 4.59.

*Starting from [PhP(CH<sub>2</sub>SiMe<sub>2</sub>NPh)<sub>2</sub>Ta]<sub>2</sub>( $\mu$ -H)<sub>4</sub> (prepared in situ):* A yellow solution of [PhP(CH<sub>2</sub>SiMe<sub>2</sub>NPh)<sub>2</sub>]TaMe<sub>3</sub> (850 mg, 1.28 mmol) in Et<sub>2</sub>O (50 ml) was transferred into a thick-wall glass vessel equipped with a Teflon valve and thoroughly degassed via three freeze-pump-thaw cycles. The vessel was cooled in liquid nitrogen, filled with H<sub>2</sub> gas and sealed under atmospheric pressure. The reaction mixture was allowed to warm to room temperature, while the pressure inside the vessel slowly rose to approximately four atmospheres. After stirring at room temperature over night, a purple solution of [PhP(CH<sub>2</sub>SiMe<sub>2</sub>NPh)<sub>2</sub>Ta]<sub>2</sub>( $\mu$ -H)<sub>4</sub> was obtained. The vessel was cooled in liquid nitrogen, the headspace evaporated and a thoroughly degassed solution of carbon disulfide (3.5 ml, 0.2M in Et<sub>2</sub>O, 0.70 mmol, 1.1 eq) condensed into the vessel. Note that exposure to dinitrogen has to be avoided during this procedure, due to the N<sub>2</sub>-sensitivity of [PhP(CH<sub>2</sub>SiMe<sub>2</sub>NPh)<sub>2</sub>Ta]<sub>2</sub>( $\mu$ -H)<sub>4</sub>. The vessel was then sealed and warmed to room temperature under static vacuum while stirring. Shortly after the reaction mixture had reached room temperature, the purple solution turned brown-orange within a few minutes. Stirring was continued for 1 h and all volatiles removed in vacuum subsequently. Hexanes (10 ml) and a few drops of benzene were added to the residue to precipitate the product as an orange powder, which was filtered off, rinsed with hexanes (2 × 5 ml) and dried in vacuum. Yield: 480 mg, 0.37 mmol, 58%. A second crop (80 mg, 0.06 mmol, 9%) was obtained from the filtrate after 2 d at -40°C. Analytical data were found to be identical with that above.

### [PhP(CH<sub>2</sub>SiMe<sub>2</sub>NPh)<sub>2</sub>Ta( $\mu$ -S)]<sub>2</sub> (3).

*Starting from [PhP(CH<sub>2</sub>SiMe<sub>2</sub>NPh)<sub>2</sub>Ta( $\mu$ -S)]<sub>2</sub>( $\mu$ -CH<sub>2</sub>):* A solution of [PhP(CH<sub>2</sub>SiMe<sub>2</sub>NPh)<sub>2</sub>Ta( $\mu$ -S)]<sub>2</sub>( $\mu$ -CH<sub>2</sub>) (2) (250 mg, 0.20 mmol) dissolved in Et<sub>2</sub>O (60 ml) was transferred into a thick-wall glass vessel equipped with a Teflon valve and degassed via two freeze-pump-thaw cycles. Dihydrogen gas was added to the vessel at -196°C before it was sealed and warmed to room temperature. After stirring for 4 d under H<sub>2</sub>-pressure (approximately four atmospheres), excess dihydrogen was released and the solvent evaporated to dryness. The residual brown powder was triturated with hexanes (10 ml) and the brownish-ocher product filtered off, washed with hexanes (2 × 5 ml) and dried in vacuum. Yield: 180 mg, 0.14 mmol, 69%. <sup>1</sup>H NMR (C<sub>6</sub>D<sub>6</sub>):  $\delta$  -0.21 (s, 12H, SiCH<sub>3</sub>), 0.32 (s, 12H, SiCH<sub>3</sub>), 1.62 (ABX, 4H, SiCH<sub>2</sub>P), 1.84 (ABX, 4H, SiCH<sub>2</sub>P), 7.00, 7.18, 7.40 and 7.68 (m, 30H total, phenyl protons). <sup>1</sup>H{<sup>31</sup>P} NMR (C<sub>6</sub>D<sub>6</sub>), selected peaks only: 1.62 (d, 4H,  $^2J_{\text{H,H}} = 13.7$  Hz, SiCH<sub>2</sub>P), 1.84 (d, 4H,  $^2J_{\text{H,H}} = 13.7$  Hz, SiCH<sub>2</sub>P). <sup>31</sup>P{<sup>1</sup>H} NMR (C<sub>6</sub>D<sub>6</sub>):  $\delta$  13.0 (s). <sup>13</sup>C APT NMR (C<sub>6</sub>D<sub>6</sub>):  $\delta$  2.13 (s, SiCH<sub>3</sub>), 2.58 (s, SiCH<sub>3</sub>), 16.16 (s, SiCH<sub>2</sub>P), 122.54, 128.47, 128.56, 130.13, 134.13 and 134.25 (*o*-, *m*- and *p*-Ph carbons), 155.25 and 155.28 (overlapping s and d, *i*-Ph carbons). MS (EI) *m/z* (%): 1294 (100) [M]<sup>+</sup>. MS (EI, high resolution) Calcd for C<sub>48</sub>H<sub>62</sub>N<sub>4</sub>P<sub>2</sub>S<sub>2</sub>Si<sub>4</sub>Ta<sub>2</sub>: 1294.19286. Found: 1294.19364. Anal. Calcd for C<sub>48</sub>H<sub>62</sub>N<sub>4</sub>P<sub>2</sub>S<sub>2</sub>Si<sub>4</sub>Ta<sub>2</sub>: C 44.51, H 4.82, N 4.33. Found: C 44.58, H 4.87, N 4.10.

*Starting from [PhP(CH<sub>2</sub>SiMe<sub>2</sub>NPh)<sub>2</sub>Ta]<sub>2</sub>( $\mu$ -H)<sub>4</sub> (prepared in situ):* A solution of [PhP(CH<sub>2</sub>SiMe<sub>2</sub>NPh)<sub>2</sub>]TaMe<sub>3</sub> (410 mg, 0.62 mmol) as described in the preparation of 2. The purple solution was frozen in liquid nitrogen and the headspace of the vessel evaporated. Subsequently, a thoroughly degassed solution of carbon disulfide (1.7 ml, 0.2M in Et<sub>2</sub>O, 0.34 mmol, 1.1 eq) was condensed in and the vessel filled with dihydrogen, sealed and warmed to room temperature. The pressurized reaction mixture (approximately four atmospheres) was stirred for 4 d at room temperature. The over-pressure was then released and the brown solution evaporated to dryness. Hexanes (5 ml) was added to the tacky residue, resulting in the

precipitation of the product as a brownish-ocher powder, which was filtered off, rinsed with hexanes ( $2 \times 2$  ml) and dried in vacuum. Yield: 260 mg, 0.20 mmol, 64%. Analytical data were found to be identical with that above.

### X-ray Crystallographic Analyses

Suitable single crystals were selected in a Glovebox, coated in Fomblin oil and mounted on a glass fiber. X-ray data were collected on a Rigaku/ADSC CCD (compound **2**) or on a Bruker X8 Apex II diffractometer (compound **3**) with graphite-monochromated Mo  $K_{\alpha}$  radiation ( $\lambda = 0.71073 \text{ \AA}$ ) at a temperature of  $-100 \pm 1^{\circ}\text{C}$ . Data were collected and integrated using the Bruker SAINT software package.<sup>[2]</sup> Absorption corrections were performed using the using the multiscan technique (SADABS).<sup>[3]</sup> The structures were solved by direct methods and refined using all reflections with the SHELX-97 program package.<sup>[4]</sup> All non-hydrogen atoms were refined anisotropically. Hydrogen atoms were placed in calculated positions and assigned to an isotropic displacement parameter. Structures were solved and refined using the WinGX (version 1.80.05) software package.<sup>[5]</sup>

Solvent accessible voids with virtually no residual electron density are found in the crystal packing of **2**. The highest peak ( $1.38 \text{ e}^{-}/\text{\AA}^3$ ) and the deepest hole ( $-0.96 \text{ e}^{-}/\text{\AA}^3$ ) in the residual electron density map indicate the absence of co-crystallized solvents. However, co-crystallized solvent molecules might have been present before the crystals were immersed and selected under Fomblin oil. During the time of crystal selection, the latter solvents might have diffused out of the cavities into the surrounding oil.

In the unit cell of compound **3**, two independent molecules are present, which differ slightly in the positions of the ligand's methylene linkers. One molecule is perfectly symmetric (inversion center; half of the molecule is generated by symmetry operation), while the second one deviates marginally from ideal  $C_i$  symmetry (a complete molecule is present in the asymmetric unit). However, the molecules' bond lengths and angles between the heavy atoms are only insignificantly different. Therefore, only the crystallographically asymmetric molecule is shown in Figure S1 below (hydrogen atoms, phenyl and silylmethyl groups omitted for sake of clarity).

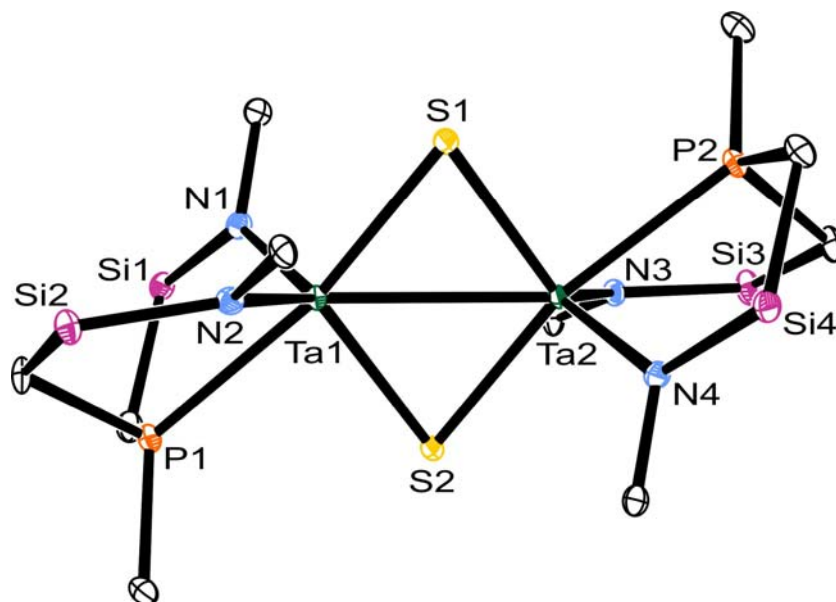

Figure S1: Molecular structure of **3**. Selected bond lengths ( $\text{\AA}$ ) and angles ( $\text{deg}$ ): Ta1-Ta2, 2.8612(2); Ta1-S1, 2.3760(8); Ta1-S2, 2.3641(8); Ta2-S1, 2.3641(8), Ta2-S2, 2.3689(7); S1...S2, 3.7745(2); S1-Ta1-S2, 105.55(3); S1-Ta2-S2, 105.78(3); Ta1-S1-Ta2, 74.26(2); Ta1-S2-Ta2, 74.39(2); P2-Ta2-Ta1-P1, 179.83(4).

Table S1: Crystal data and refinement details for **2** and **3**.

| compound                                                      | <b>2</b>                                                                                                     | <b>3</b>                                                                                                     |
|---------------------------------------------------------------|--------------------------------------------------------------------------------------------------------------|--------------------------------------------------------------------------------------------------------------|
| empirical formula                                             | C <sub>49</sub> H <sub>62</sub> N <sub>4</sub> P <sub>2</sub> S <sub>2</sub> Si <sub>4</sub> Ta <sub>2</sub> | C <sub>48</sub> H <sub>62</sub> N <sub>4</sub> P <sub>2</sub> S <sub>2</sub> Si <sub>4</sub> Ta <sub>2</sub> |
| formula weight                                                | 1307.35                                                                                                      | 1295.34                                                                                                      |
| crystal size [mm]                                             | 0.30 × 0.25 × 0.05                                                                                           | 0.20 × 0.16 × 0.12                                                                                           |
| crystal system                                                | orthorhombic                                                                                                 | monoclinic                                                                                                   |
| space group                                                   | <i>Pbcn</i> (No. 60)                                                                                         | <i>P2<sub>1</sub>/n</i> (No. 14)                                                                             |
| <i>a</i> [Å]                                                  | 21.9524(8)                                                                                                   | 13.9856(8)                                                                                                   |
| <i>b</i> [Å]                                                  | 21.7688(9)                                                                                                   | 16.6498(10)                                                                                                  |
| <i>c</i> [Å]                                                  | 24.6370(10)                                                                                                  | 35.4061(18)                                                                                                  |
| $\beta$ [°]                                                   | 90.0                                                                                                         | 100.996(3)                                                                                                   |
| <i>V</i> [Å <sup>3</sup> ]                                    | 11773.5(8)                                                                                                   | 8093.2(8)                                                                                                    |
| $\rho_{\text{calcd.}}$ [g cm <sup>-3</sup> ]                  | 1.475                                                                                                        | 1.595                                                                                                        |
| <i>Z</i>                                                      | 8                                                                                                            | 6                                                                                                            |
| <i>F</i> (000)                                                | 5184                                                                                                         | 3852                                                                                                         |
| $\mu$ [mm <sup>-1</sup> ]                                     | 3.955 (Mo-K $\alpha$ )                                                                                       | 4.214 (Mo-K $\alpha$ )                                                                                       |
| <i>T</i> <sub>max</sub> / <i>T</i> <sub>min</sub>             | 0.631 / 0.821                                                                                                | 0.441 / 0.596                                                                                                |
| <i>hkl</i> range                                              | 0 - 28, 0 - 26, $\pm$ 31                                                                                     | -15 - 16, -18 - 19, $\pm$ 42                                                                                 |
| $\theta$ range [°]                                            | 2.49 - 28.08                                                                                                 | 1.49 - 25.07                                                                                                 |
| measured reflections                                          | 22431                                                                                                        | 55572                                                                                                        |
| unique reflections                                            | 13086                                                                                                        | 14312                                                                                                        |
| observed reflections <i>I</i> > 2 $\sigma$ ( <i>I</i> )       | 7696                                                                                                         | 12540                                                                                                        |
| refined parameters                                            | 576                                                                                                          | 850                                                                                                          |
| goodness-of-fit                                               | 1.015                                                                                                        | 1.048                                                                                                        |
| <i>R</i> 1, <i>wR</i> 2 ( <i>I</i> > 2 $\sigma$ ( <i>I</i> )) | 0.0368, 0.0857                                                                                               | 0.0215, 0.0435                                                                                               |
| <i>R</i> 1, <i>wR</i> 2 (all data)                            | 0.0922, 0.1010                                                                                               | 0.0288, 0.0450                                                                                               |
| residual electron dens. [e Å <sup>-3</sup> ]                  | 1.368 / -0.964                                                                                               | 0.800 / -0.693                                                                                               |

## References

- [1] a) M. D. Fryzuk, S. A. Johnson, B. O. Patrick, A. Albinati, S. A. Mason, T. F. Koetzle, *J. Am. Chem. Soc.* **2001**, *123*, 3960-3973; b) M. D. Fryzuk, S. A. Johnson, S. J. Rettig, *J. Am. Chem. Soc.* **1998**, *120*, 11024-11025.
- [2] SAINT. Version 7.03A. Bruker AXS Inc., Madison, Wisconsin, USA (1997-2003).
- [3] SADABS. Bruker Nonius area detector scaling and absorption correction - V2.10, Bruker AXS Inc., Madison, Wisconsin, USA (2003).
- [4] G. M. Sheldrick, *Acta Cryst.* **2008**, *A64*, 112-122.
- [5] L. J. Farrugia, *J. Appl. Cryst.* **1999**, *32*, 837-838.

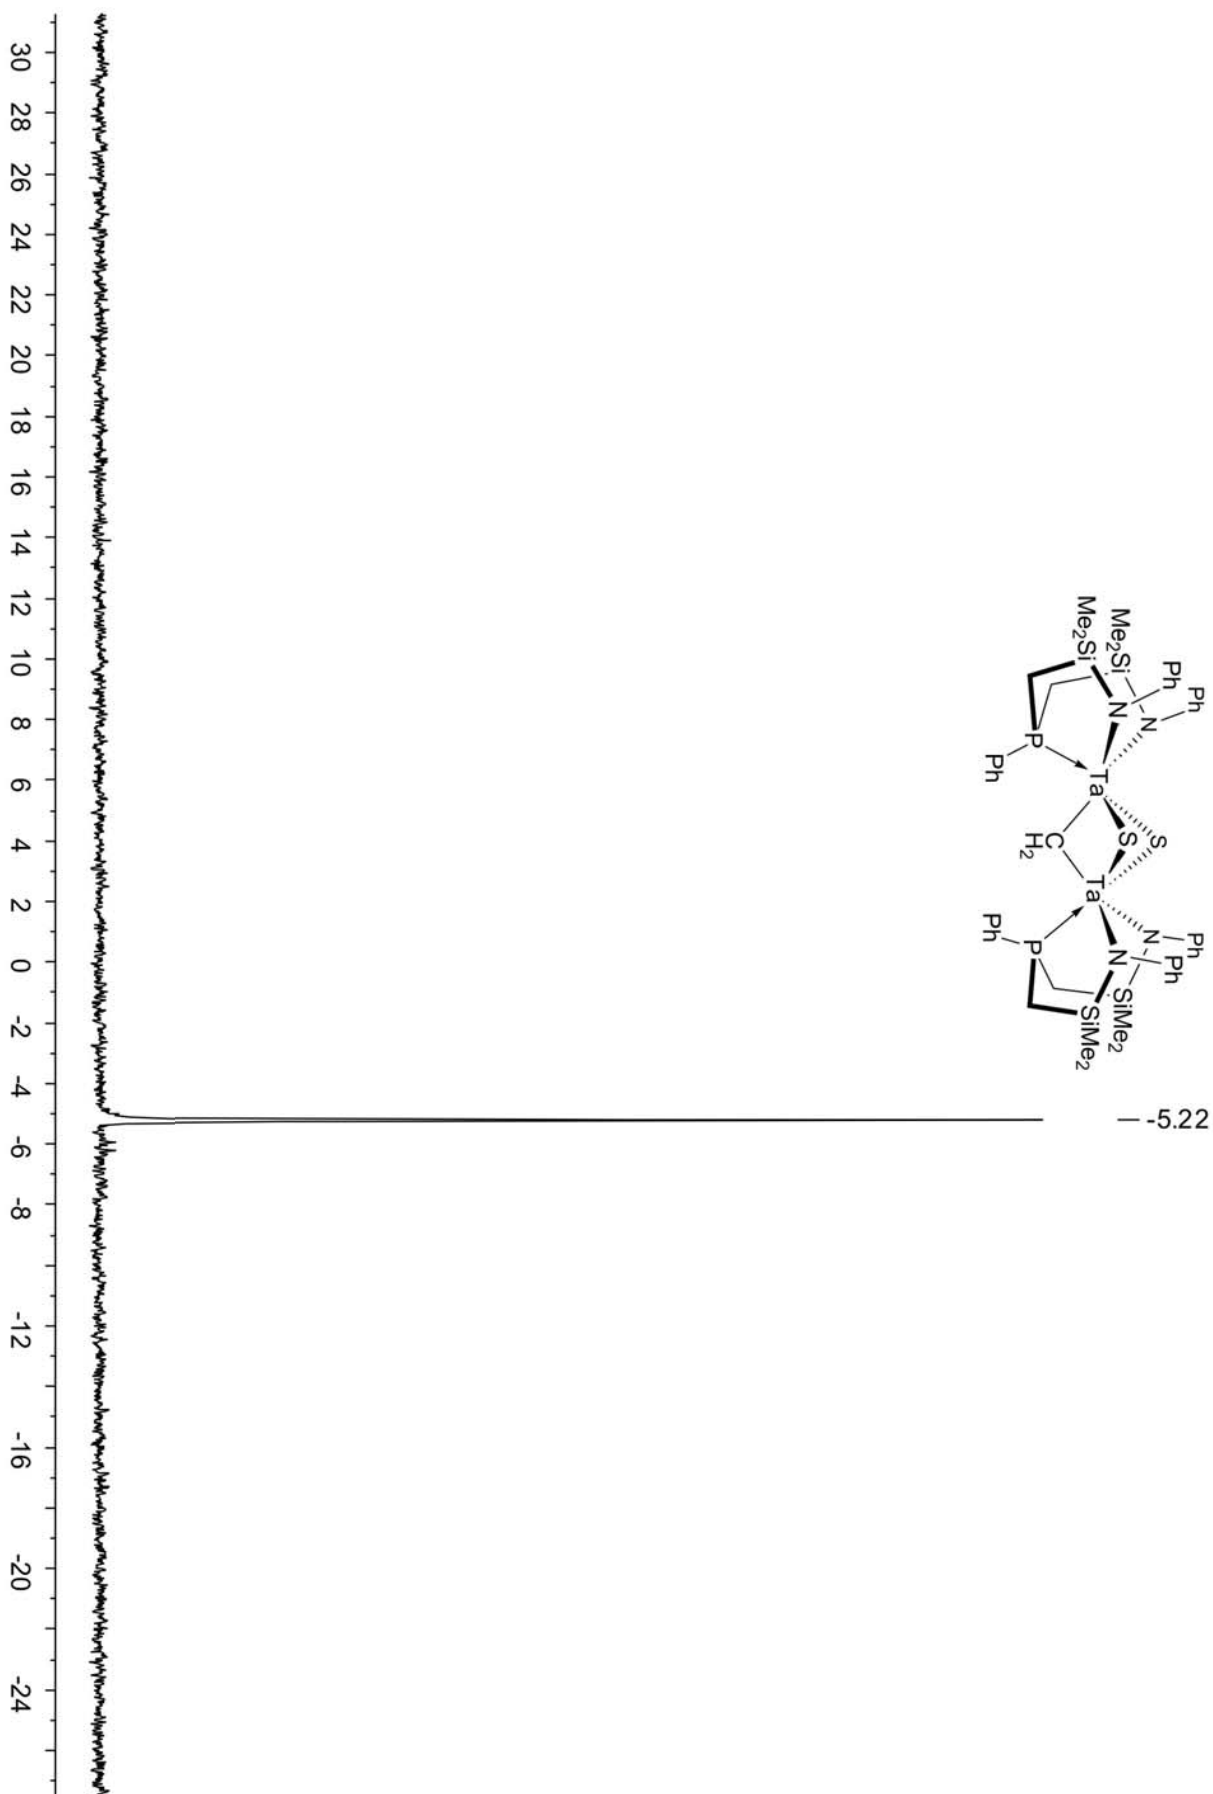

Figure S2:  $^{31}\text{P}\{^1\text{H}\}$  NMR spectrum (161.9 MHz, RT) of **2** in  $\text{C}_6\text{D}_6$ .

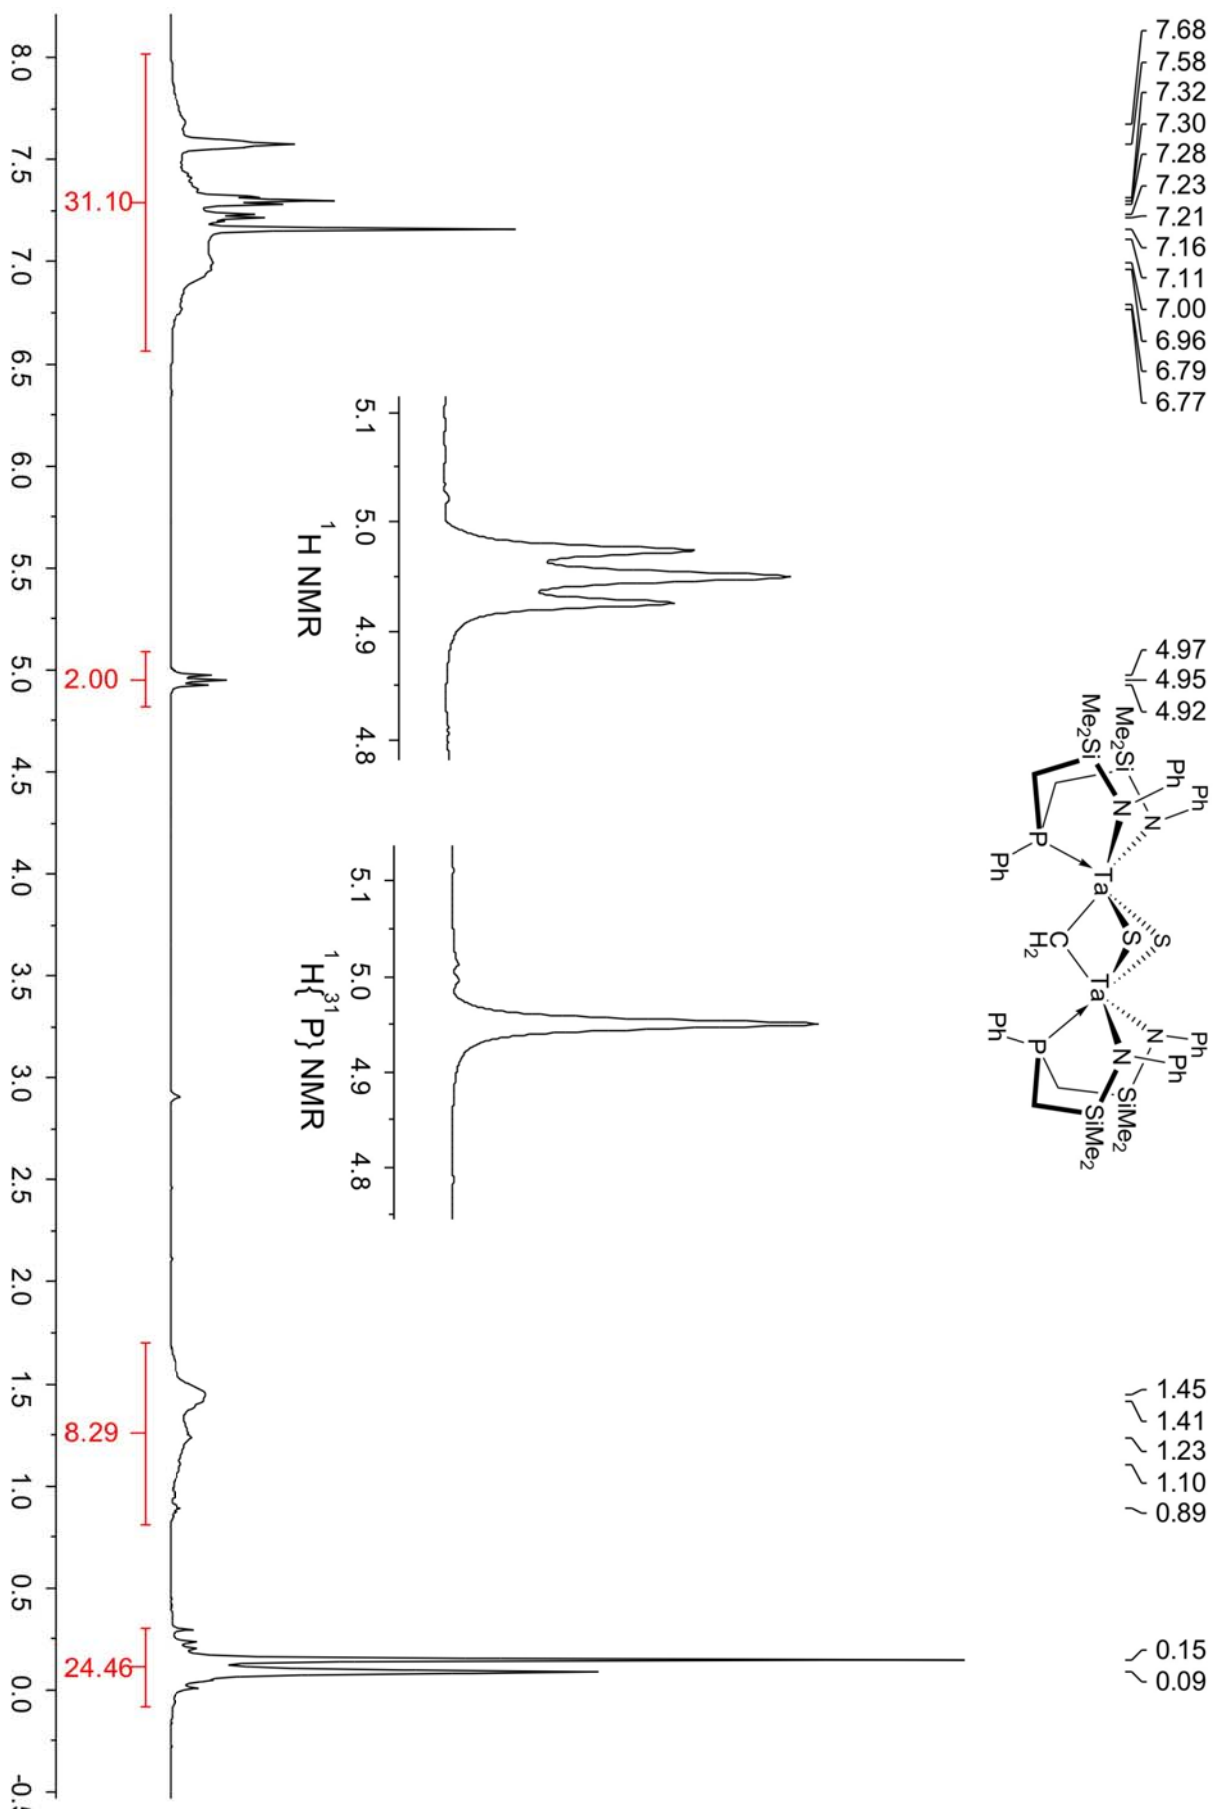

Figure S3:  $^1\text{H}$  NMR spectrum (400MHz, RT) of **2** in  $\text{C}_6\text{D}_6$ .

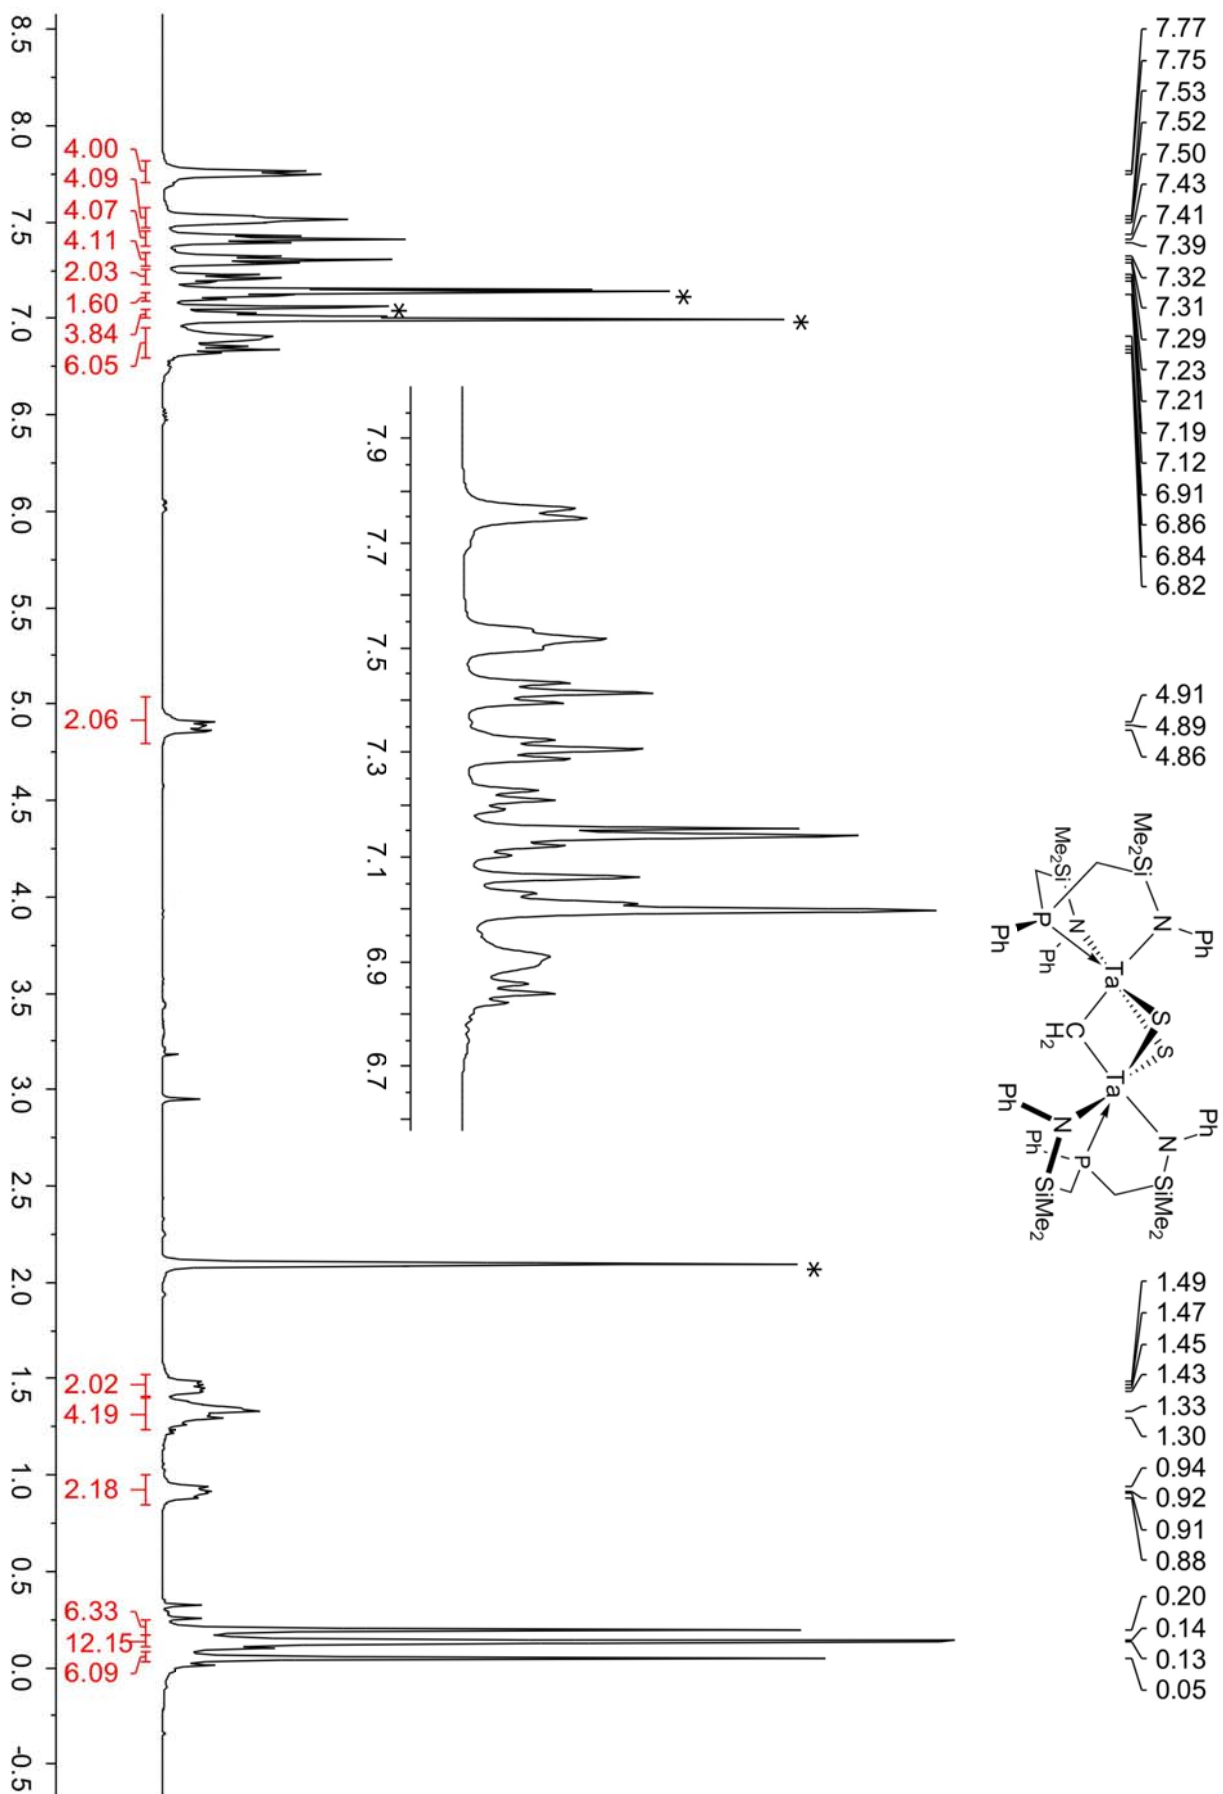

Figure S4: <sup>1</sup>H NMR spectrum (400 MHz, -30°C) of **2** in C<sub>7</sub>D<sub>8</sub>. Residual proton signals of C<sub>7</sub>D<sub>8</sub> are marked by an asterisk.

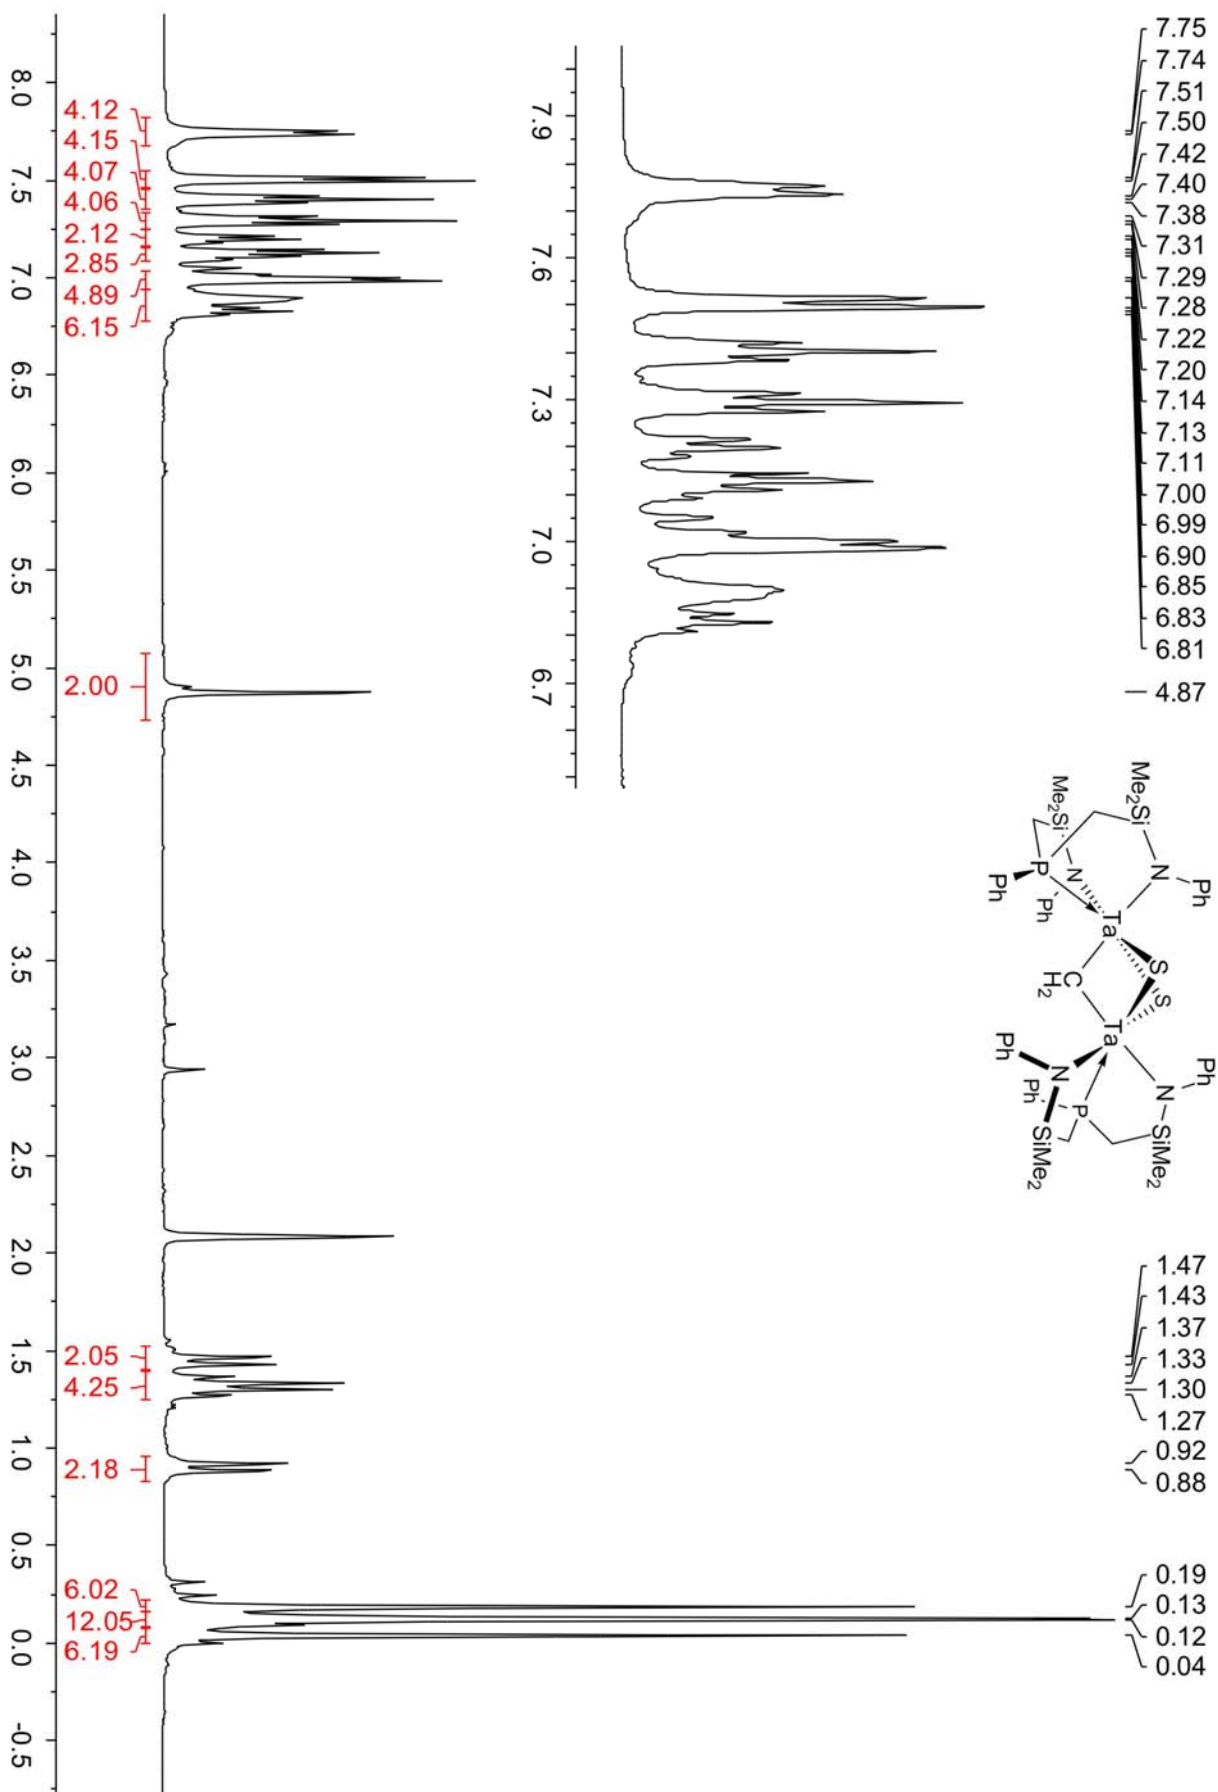

Figure S5:  $^1\text{H}\{^{31}\text{P}\}$  NMR spectrum (400MHz,  $-30^\circ\text{C}$ ) of **2** in  $\text{C}_7\text{D}_8$ .



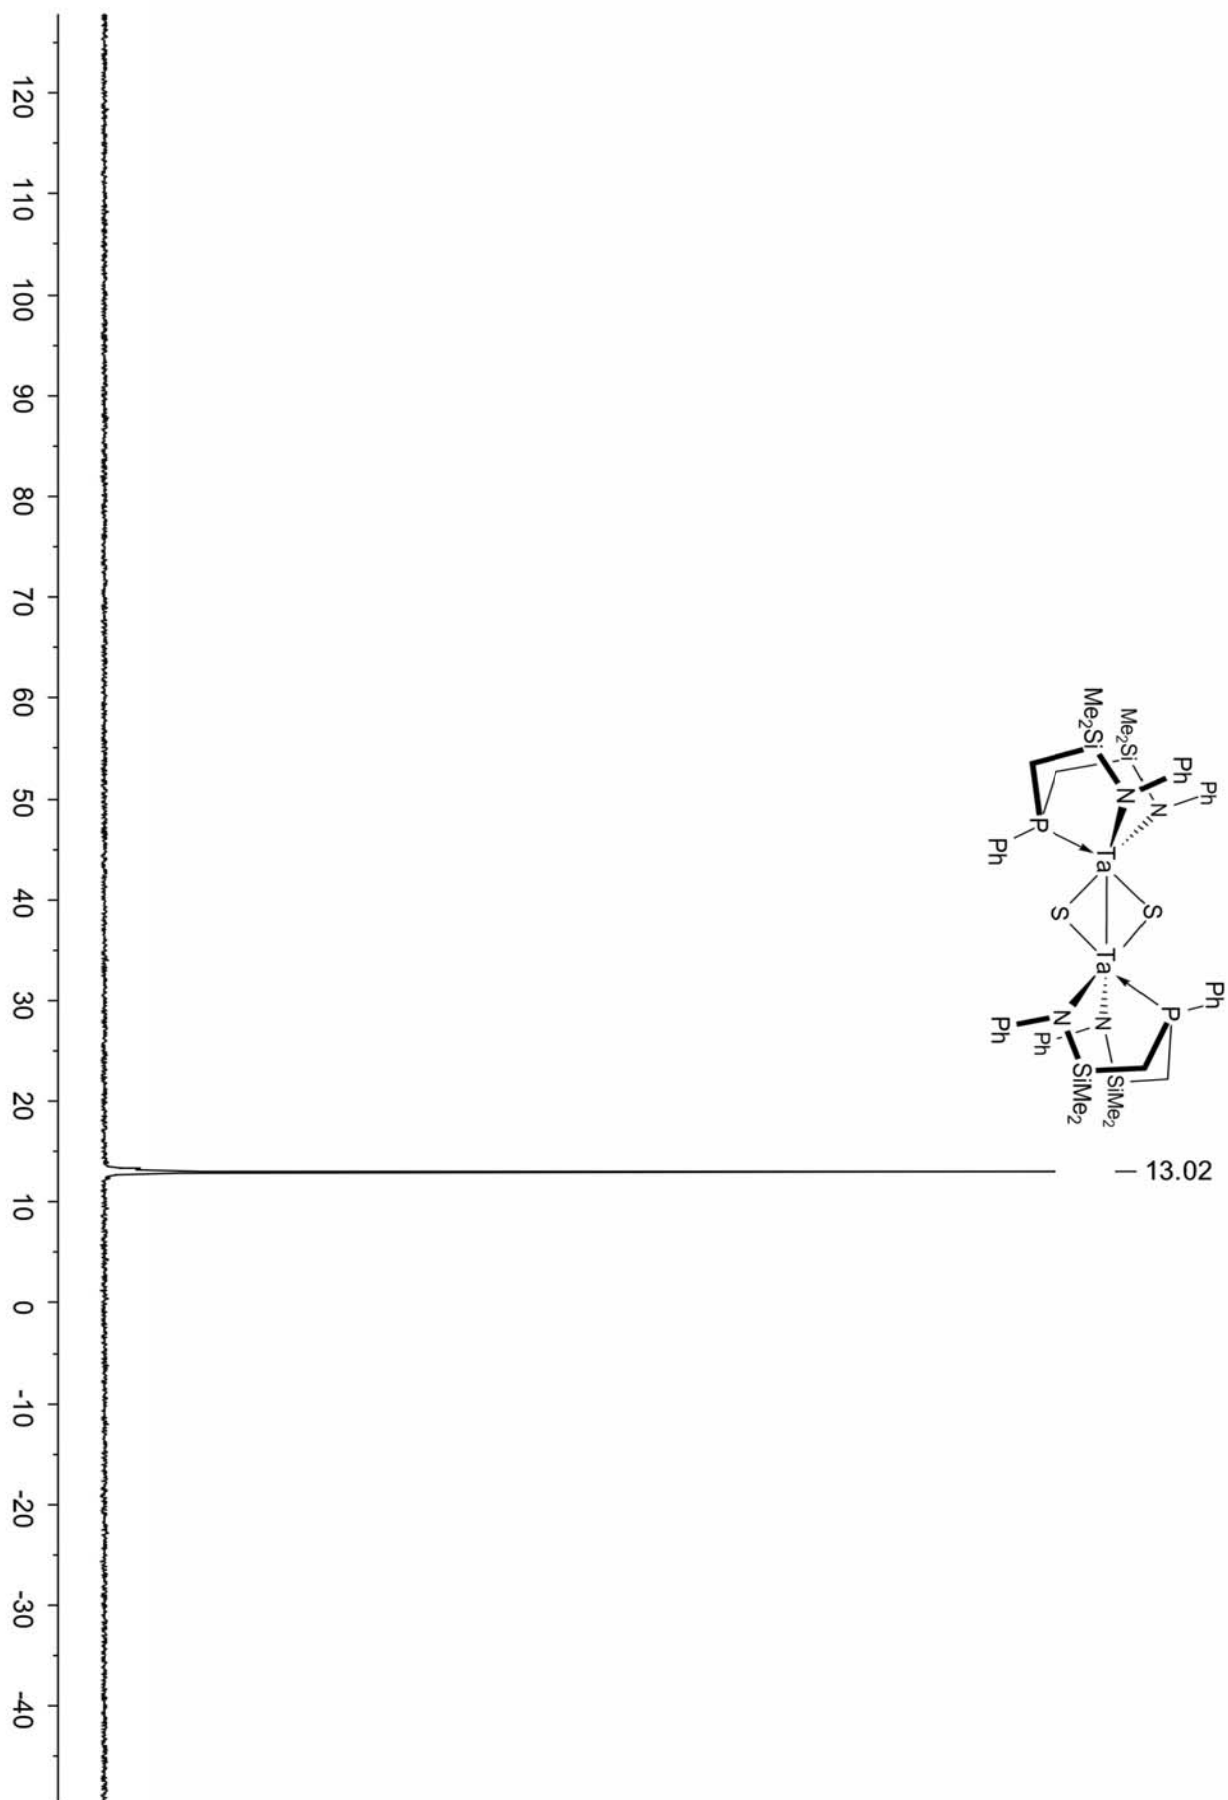

Figure S6:  $^{31}\text{P}\{^1\text{H}\}$  NMR spectrum (161.9 MHz, RT) of **3** in  $\text{C}_6\text{D}_6$ .

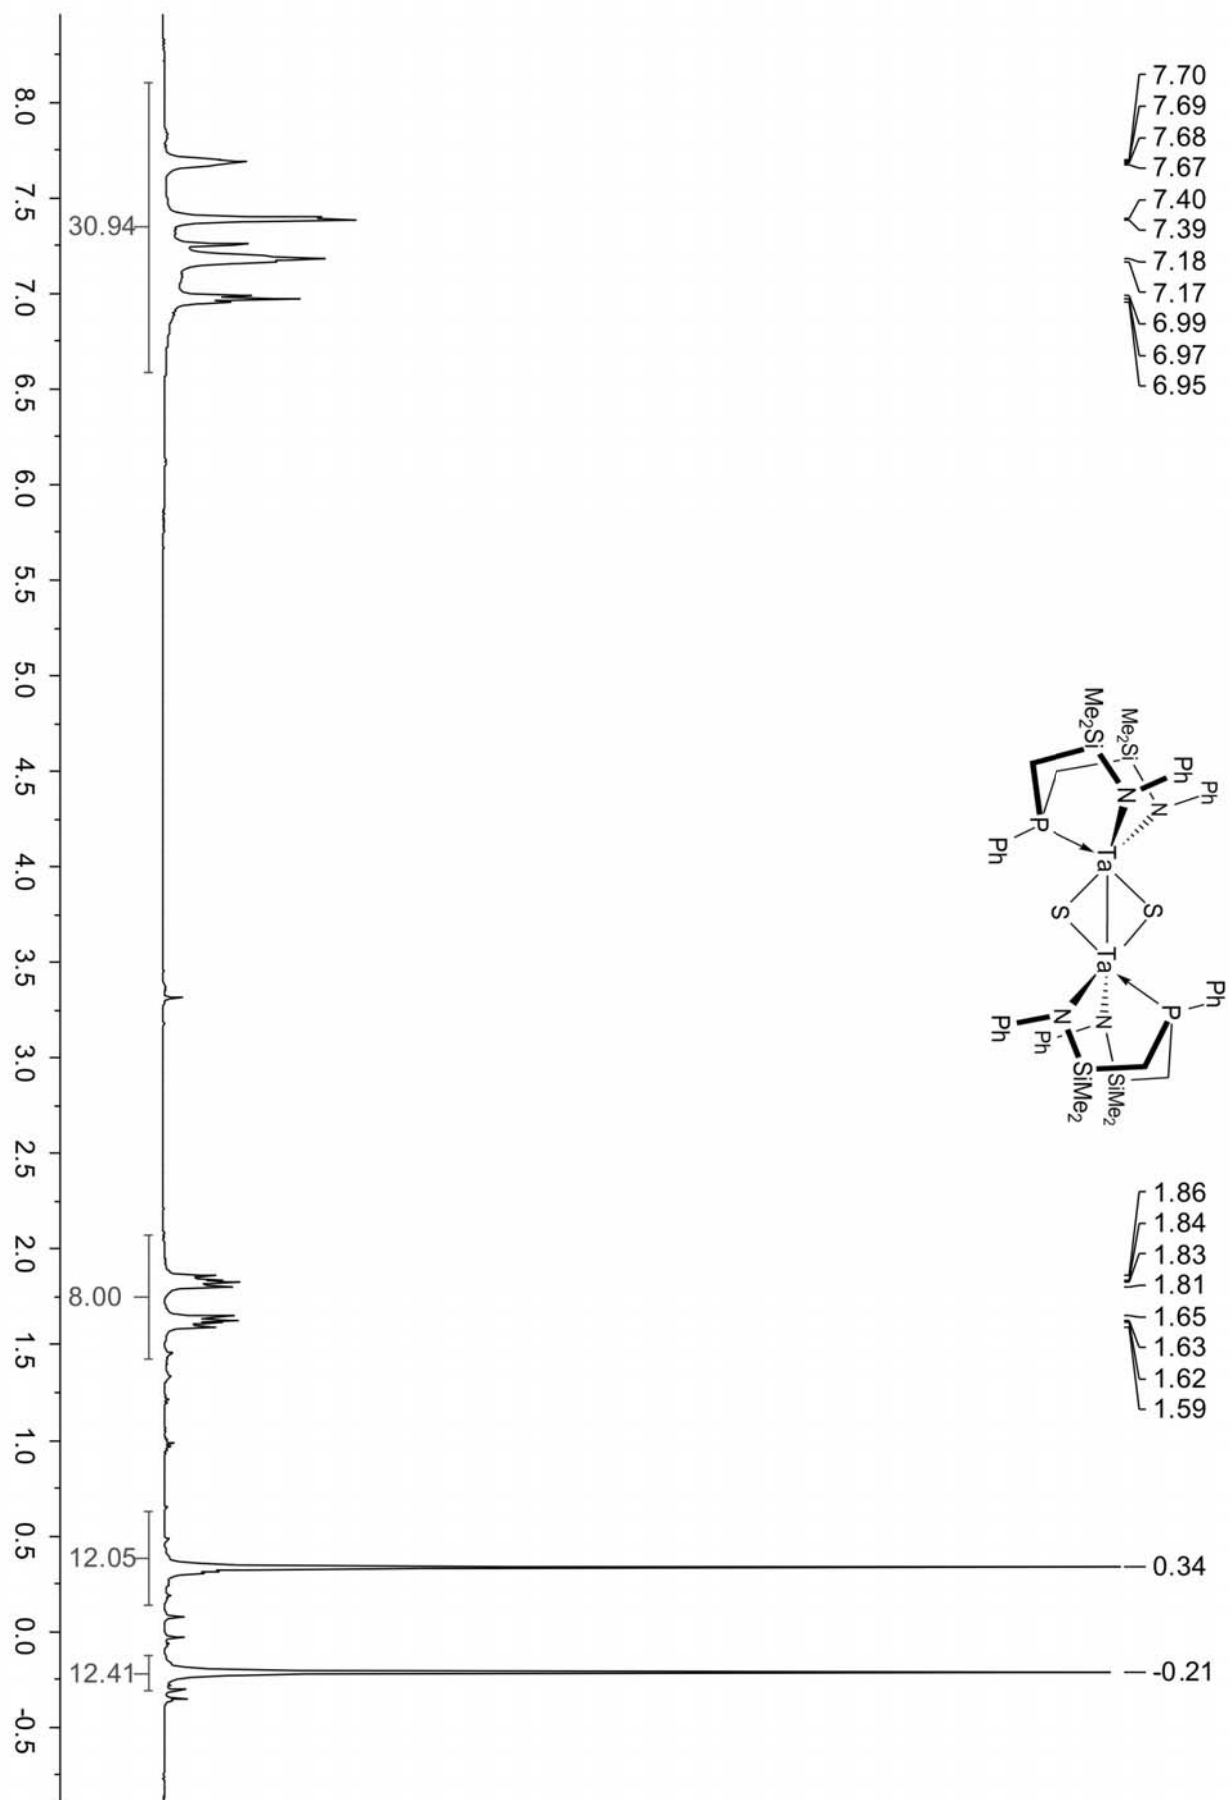

Figure S7: <sup>1</sup>H NMR spectrum (400MHz, RT) of **3** in C<sub>6</sub>D<sub>6</sub>.

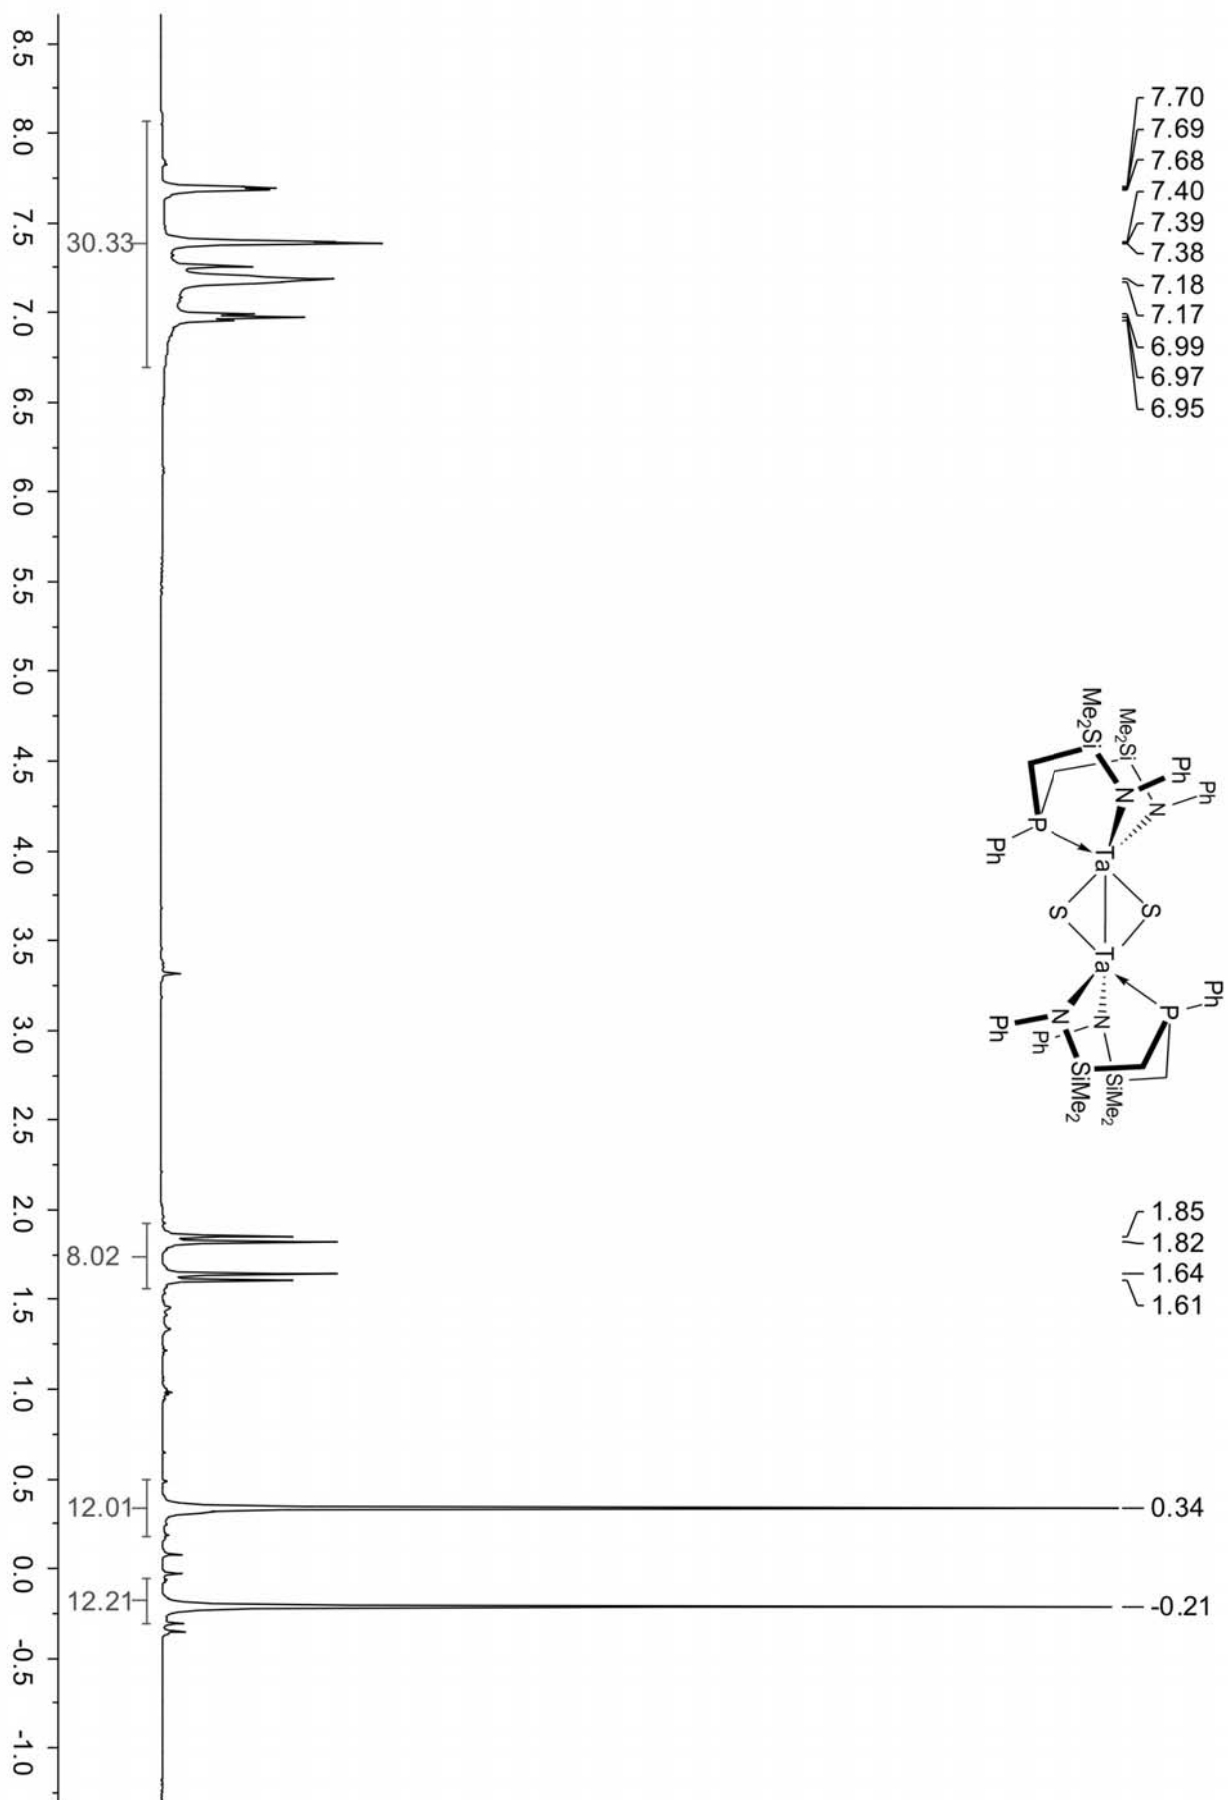

Figure S8:  $^1\text{H}\{^{31}\text{P}\}$  NMR spectrum (400MHz, RT) of **3** in  $\text{C}_6\text{D}_6$ .
